# Supplementary material for: Epigenetics of Notch1 regulation in pulmonary microvascular rarefaction following extrauterine growth restriction
Source: PubMed Central journal article supplement (PMC4486133; doi:10.1186/s12931-015-0226-2), 2015-06-04
Supplement: 12931_2015_226_MOESM1_ESM.pdf [file 12931_2015_226_MOESM1_ESM.pdf]

Additional file 1:Table S1. Primers used for the amplification of genes

| <b>Gene</b>                                  | <b>Forward</b>                    | <b>Reverse</b>            |
|----------------------------------------------|-----------------------------------|---------------------------|
| <b>For RT-qPCR</b>                           |                                   |                           |
| $\beta$ -actin                               | GCCAACCGTGAAAAGATG                | TGCCAGTGGTACGACCAG        |
| Notch1                                       | CACCCATGACCACTACCCAGTT            | CCTCGGACCAATCAGAGATGTT    |
| Hes-1                                        | CAACACGACACCGGACAAAC              | CGGAGGTGCTTCACTGTCAT      |
| Hey-1                                        | TGGCTGAAGTTGCCCGTTAT              | TGTGTGGGTGATGTCCGAAG      |
| Hey-2                                        | GCTTCCGTACCTCTGGTGAG              | TCCCGTTCGTGTGAGTGAAC      |
| <b>For ChIP-qPCR analysis</b>                |                                   |                           |
| P1                                           | GGGAGGCTCGTAGGACAA                | CGTTCACGGTAACTCTTC        |
| P2                                           | TTTAAGGTCAAGCGTTCCG               | GCATTTCAATAGTAGAGGAGGT    |
| P3                                           | GGTGCAGCTACGCCTTTC                | CCCTTGTGGACCCTGTCTC       |
| <b>For Bisulphite Sequencing(nested PCR)</b> |                                   |                           |
| BS1 inner                                    | TTTTTGTGATTGGTGTGGTTATT           | ACCCCTTCTAAAACCTTCTAAACAT |
| outer                                        | TTTAAGTATATTTTAGGGTTTTTGTTT       | CTAAAAAACTAATCAATACATTACC |
| BS2 inner                                    | ATTAGTTGTTTTGGAGGGAGTAGGT         | AAAAACCCAAACAAACAAAATATCA |
| outer                                        | TTTAAGGAGAGGTTTAGAAGTATTTTTAGGAGA | CTAAAATAACCAACACCAATCACAA |
